# Supplementary material
Source: PubMed Central journal article supplement (PMC2040484)

**A**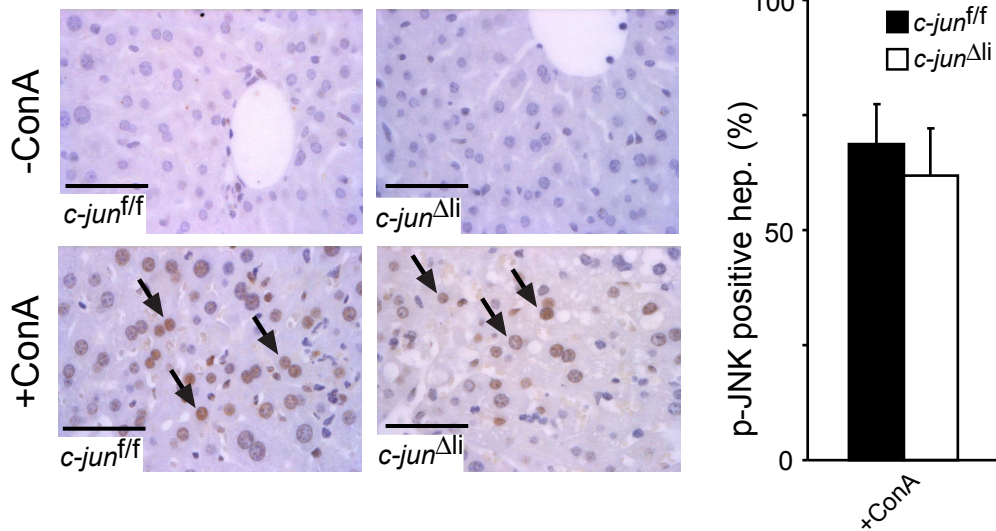**B**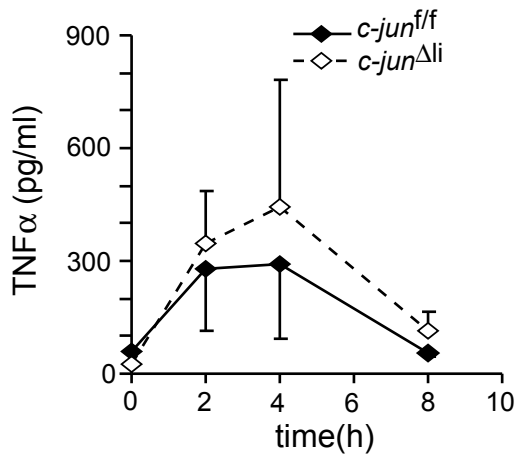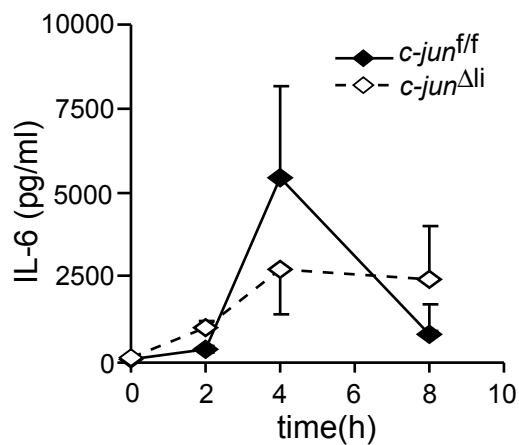**C**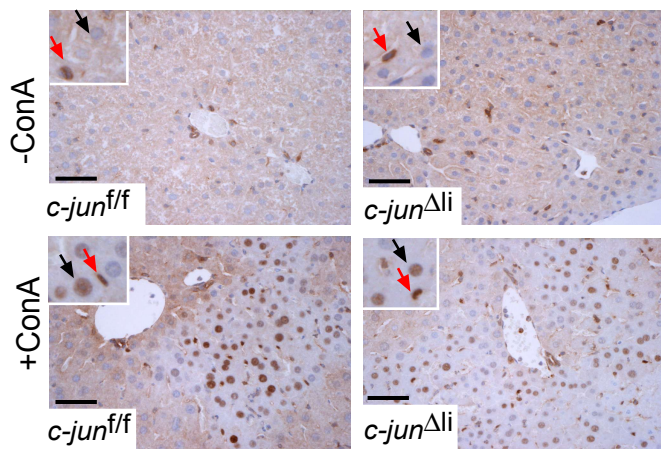**D**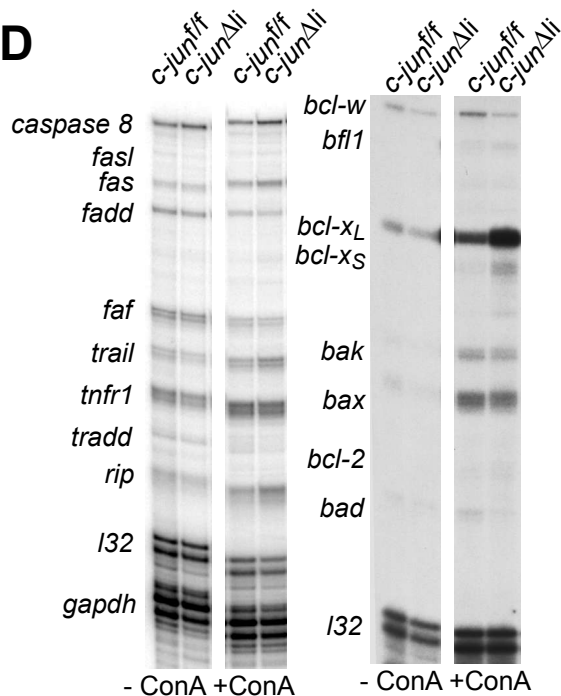

Supplement: pnas_0706272104_2.pdf [file pnas_0706272104_2.pdf]
